# Supplementary material
Source: PubMed Central journal article supplement (PMC2801743)
Supplement: mmc1.pdf [file mmc1.pdf]

**Supplemental Data**

***AJHG*, Volume 86**

**Targeted Next-Generation Sequencing Appoints *C16orf57***

**as Clericuzio-Type Poikiloderma with Neutropenia Gene**

**Ludovica Volpi, Gaia Roversi, Elisa Adele Colombo, Nico Leijsten, Daniela Concolino, Andrea Calabria, Maria Antonietta Mencarelli, Michele Fimiani, Fabio Macchiardi, Rolph Pfundt, Eric F.P.M. Schoenmakers, and Lidia Larizza**

## Figure S1. Flow Chart of the Array Capture and Deep Sequencing Procedure

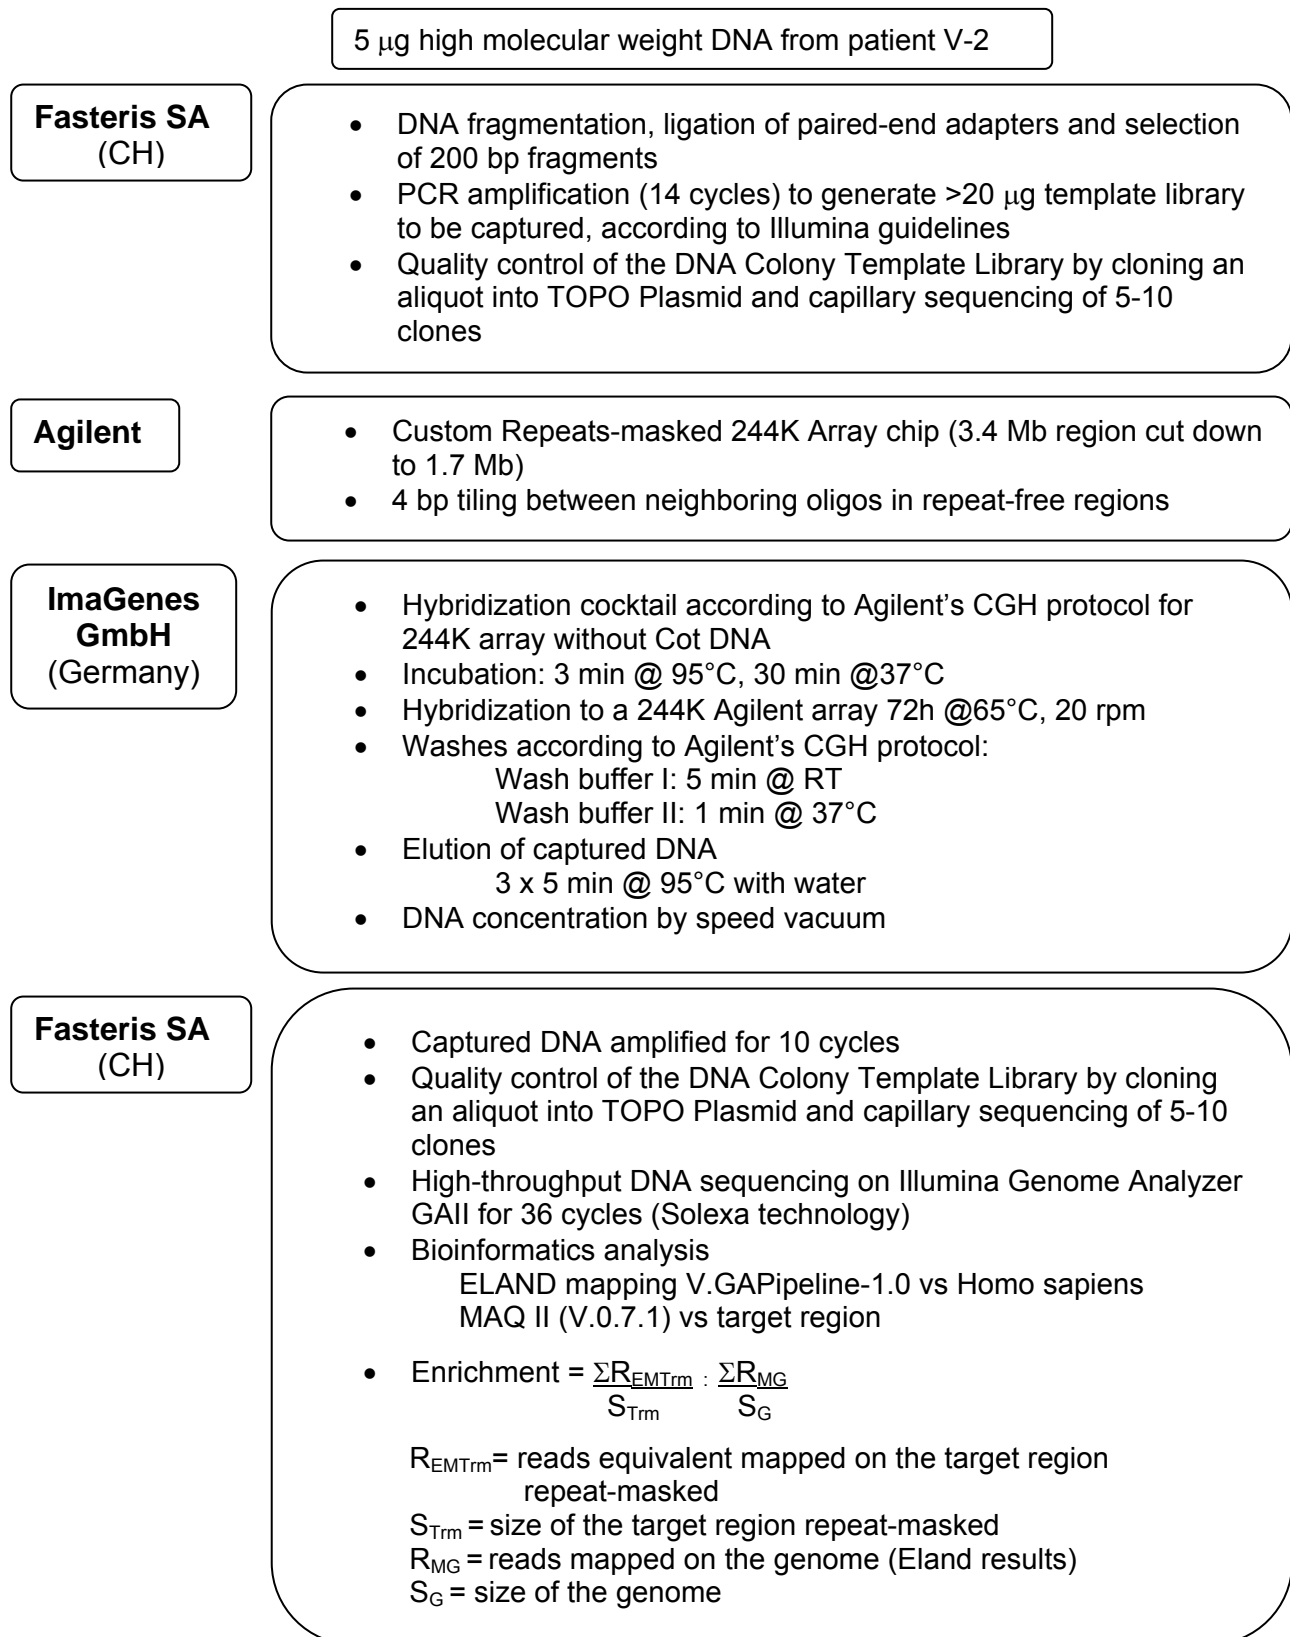

**Figure S2. Graphical View of Predicted Domain Structure of C16orf57 Protein**

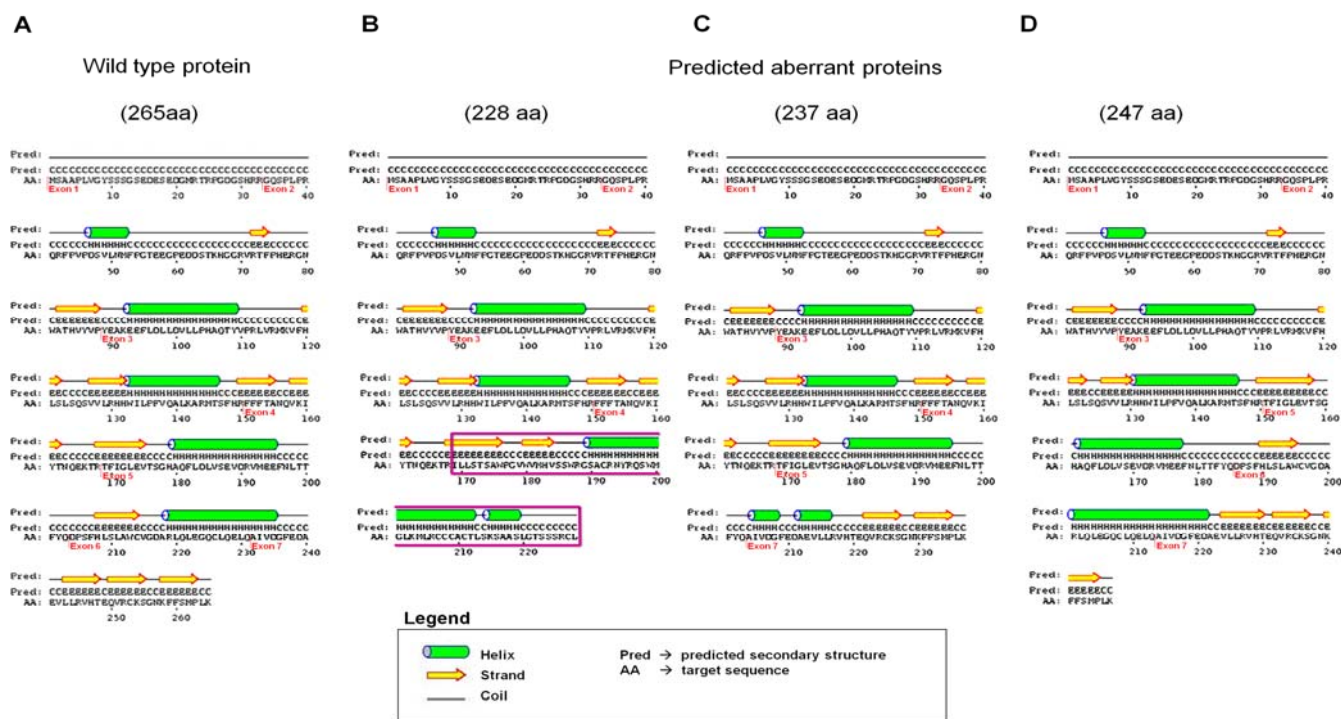

The green cylinders represent  $\alpha$  helices, the yellow arrows  $\beta$  sheets and the thin black lines putative coils. The protein segments encoded by the seven *C16orf57* exons are indicated by red dashed lines. (A) Wild type *C16orf57* protein (NP\_078874). (B) *C16orf57* protein conformation predicted by mutation c.504-2A>C present in the homozygous condition in the affected sibs of the inbred family. Upon skipping of exon 5 and frameshift, a truncated protein lacking 61 residues (boxed in purple) results (C), (D) Altered protein structures predicted by in frame loss of exon 4 and exon 6 encoded domains due to missense c.502A>G and c.666\_676+1del12 mutations of the PN compound heterozygous patient. (PSIPRED Protein Structure Prediction Server)

**Figure S3. C16orf57 Protein Conservation**

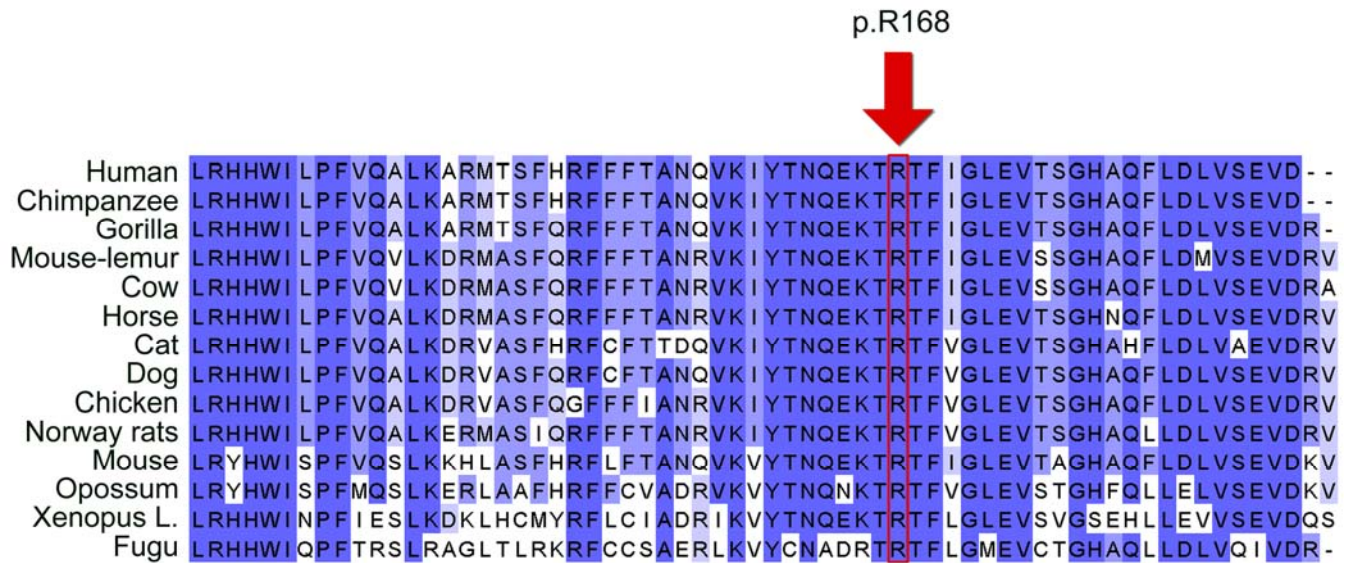

Alignment of C16orf57 protein sequences from Human to Fugu by ClustalW. Identical aminoacid residues are in dark blue, similar residues in light blue. The arrow points to the functional, highly conserved and exposed p.R168 residue (ConSeq Server).

**Figure S4. C16orf57 Taps into the RECQL4 Signalling Pathway through a Direct Interaction with SMAD4**

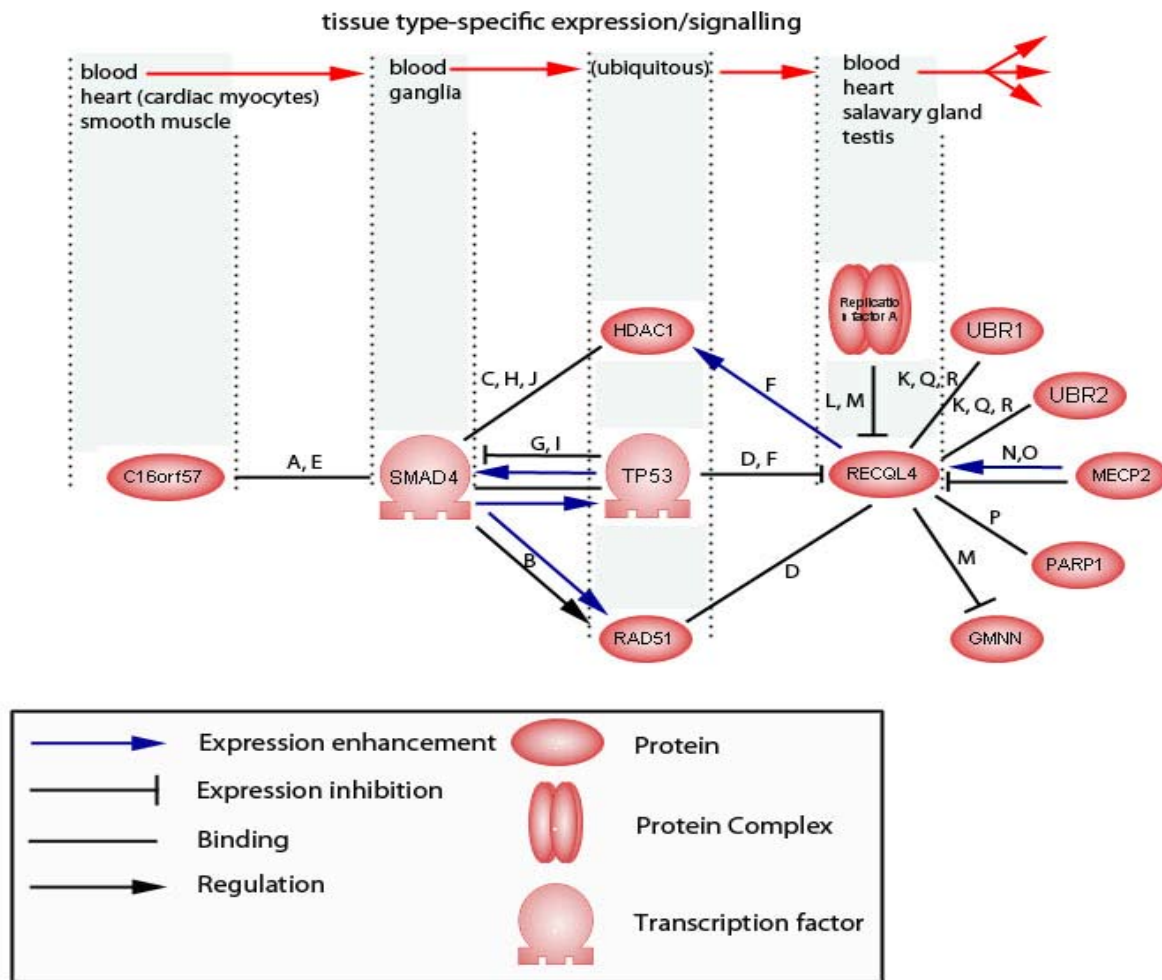

Ref.A Colland, F., et al., *Genome Res.* 14: 1324-1332 (2004)  
 Ref.B Kanamoto, T., et al., *EMBO J.* 21: 1219-1230 (2002)  
 Ref.C Kang, H.-Y., et al., *J. Biol. Chem.* 46: 43749-43756 (2002)  
 Ref.D Petkovic, M., et al., *J. Cell Sci.* 118: 4261-4269 (2005)  
 Ref.E Rual, J.F., et al., *Nature* 437: 1173-1178 (2005)  
 Ref.F Sengupta, S. et al., *Oncogene* 24: 1738-1748 (2005)  
 Ref.G Sorio, C., et al., *Virchows Arch.* 446: 239-245 (2005)  
 Ref.H Takeda, M., et al., *Mol. Biol. Cel.* 15: 963-972 (2004)  
 Ref.I Venkatasubbarao, K., et al., *Cancer Res.* 65: 2861-2871 (2005)

Ref.J Wotton, D. et al., *Cell* 97: 29-39 (1999)  
 Ref.K Yin, J., et al., *Hum. Mol. Genet.* 13: 2421-2430 (2004)  
 Ref.L Macris MA, et al., *DNA Repair (Amst)* 5:172-180 (2006)  
 Ref.M Matsuno K, et al., *Mol. Cell. Biol.* 26:4843-4852 (2006)  
 Ref.N Werner SR, et al., *Biochem.Biophys.Res.Comm.* 345:403-409 (2006)  
 Ref.O Jin W, et al., *Hum. Genet.* 123:643-653 (2008)  
 Ref.P Woo LL, et al., *Exp. Cell Res.* 312:3443-3457 (2006)  
 Ref.Q An JY, et al., *Proc. Natl. Acad. Sci. U.S.A.* 103:6212-6217 (2006)  
 Ref.R Tasaki T, et al., *Mol. Cell. Biol.* 25:7120-7136 (2005)

Two independent (protein interaction identification) studies have revealed direct interactions between the C16orf57 and SMAD4 proteins. This provides support for a model in which phenotypic overlap between RTS and PN can at least partially be explained by signalling of C16orf57 to RECQL4 through SMAD4 and HDAC1/TP53/RAD51. In addition, the fact that all these intermediate signalling proteins are expressed in blood (myeloid lineage), might explain the neutropenia as a distinctive phenotypic feature in patients with mutations in *C16orf57* (i.e. aberrant C16orf57 signalling). The model shown here was generated with the aid of Pathway Studio, whereas the interaction between C16orf57 and SMAD4 was identified by searching the STRING database and was originally identified both through Affinity Capture-MS assay (E) and a yeast-two-hybrid interaction trap (A).

A) Colland, F., Jacq, X., Trouplin, V., Mouglin, C., Groizeleau, C., Hamburger, A., Meil, A., Wojcik, J., Legrain, P., Gauthier, J.M. (2004). Functional proteomics mapping of a human signaling pathway. *Genome Res.* 14, 1324-1332.

B) Kanamoto, T., Hellman, U., Heldin, C.H., Souchelnytskyi, S. (2002). Functional proteomics of transforming growth factor-beta1-stimulated Mv1Lu epithelial cells: Rad51 as a target of TGFbeta1-dependent regulation of DNA repair. *EMBO J.* 21, 1219-1230.

C) Kang, H.Y., Huang, K.E., Chang, S.Y., Ma, W.L., Lin, W.J., Chang, C. (2002). Differential modulation of androgen receptor-mediated transactivation by Smad3 and tumor suppressor Smad4. *J. Biol. Chem.* 277, 43749-43756.

D) Petkovic, M., Dietschy, T., Freire, R., Jiao, R., Stagljar, I. (2005). The human Rothmund-Thomson syndrome gene product, RECQL4, localizes to distinct nuclear foci that coincide with proteins involved in the maintenance of genome stability. *J. Cell Sci.* 118, 4261-4269.

- E) Rual, J.F., Venkatesan, K., Hao, T., Hirozane-Kishikawa, T., Dricot, A., Li, N., Berriz, G.F., Gibbons, F.D., Dreze, M., Ayivi-Guedehoussou, N., et al. (2005). Towards a proteome-scale map of the human protein-protein interaction network. *Nature* 437, 1173-1178.
- F) Sengupta, S., Shimamoto, A., Koshiji, M., Pedoux, R., Rusin, M., Spillare, E.A., Shen, J.C., Huang, L.E., Lindor, N.M., Furuichi, Y., Harris, C.C. (2005). *Oncogene* 24, 1738-1748
- G) Sorio, C., Capelli, P., Lissandrini, D., Moore, P.S., Balzarini, P., Falconi, M., Zamboni, G., Scarpa, A. (2005). Mucinous cystic carcinoma of the pancreas: a unique cell line and xenograft model of a preinvasive lesion. *Virchows Arch.* 446, 239-245.
- H) Takeda, M., Mizuide, M., Oka, M., Watabe, T., Inoue, H., Suzuki, H., Fujita, T., Imamura, T., Miyazono, K., Miyazawa, K. (2004). Interaction with Smad4 is indispensable for suppression of BMP signaling by c-Ski. *Mol. Biol. Cell.* 15, 963-972.
- I) Venkatasubbarao, K., Choudary, A., Freeman, J.W. (2005). Farnesyl transferase inhibitor (R115777)-induced inhibition of STAT3(Tyr705) phosphorylation in human pancreatic cancer cell lines require extracellular signal-regulated kinases. *Cancer Res.* 65, 2861-2871.
- J) Wotton, D., Lo, R.S., Lee, S., Massagué, J. (1999). A Smad transcriptional corepressor. *Cell.* 97, 29-39.
- K) Yin, J., Kwon, Y.T., Varshavsky, A., Wang, W. (2004). RECQL4, mutated in the Rothmund-Thomson and RAPADILINO syndromes, interacts with ubiquitin ligases UBR1 and UBR2 of the N-end rule pathway. *Hum. Mol. Genet.* 13, 2421-2430.
- L) Macris, M.A., Krejci, L., Bussen, W., Shimamoto, A., Sung, P. (2006). Biochemical characterization of the RECQ4 protein, mutated in Rothmund-Thomson syndrome. *DNA Repair (Amst)* 5, 172-180.

- M) Matsuno, K., Kumano, M., Kubota, Y., Hashimoto, Y., Takisawa, H. (2006). The N-terminal noncatalytic region of *Xenopus* RecQ4 is required for chromatin binding of DNA polymerase alpha in the initiation of DNA replication. *Mol. Cell. Biol.* 26, 4843-4852.
- N) Werner, S.R., Prahalad, A.K., Yang, J., Hock, J.M. (2006). RECQL4-deficient cells are hypersensitive to oxidative stress/damage: Insights for osteosarcoma prevalence and heterogeneity in Rothmund-Thomson syndrome. *Biochem. Biophys. Res. Commun.* 345, 403-409.
- O) Jin, W., Liu, H., Zhang, Y., Otta, S.K., Plon, S.E., Wang, L.L. (2008). Sensitivity of RECQL4-deficient fibroblasts from Rothmund-Thomson syndrome patients to genotoxic agents. *Hum. Genet.* 123, 643-653.
- P) Woo, L.L., Futami, K., Shimamoto, A., Furuichi, Y., Frank, K.M. (2006). The Rothmund-Thomson gene product RECQL4 localizes to the nucleolus in response to oxidative stress. *Exp. Cell Res.* 312, 3443-3457.
- Q) An, J.Y., Seo, J.W., Tasaki, T., Lee, M.J., Varshavsky, A., Kwon, Y.T. (2006). Impaired neurogenesis and cardiovascular development in mice lacking the E3 ubiquitin ligases UBR1 and UBR2 of the N-end rule pathway. *Proc. Natl. Acad. Sci. U. S. A.* 103, 6212-6217.
- R) Tasaki, T., Mulder, L.C., Iwamatsu, A., Lee, M.J., Davydov, I.V., Varshavsky, A., Muesing, M., Kwon, Y.T. (2005). A family of mammalian E3 ubiquitin ligases that contain the UBR box motif and recognize N-degrons. *Mol. Cell. Biol.* 25, 7120-7136.



**Table S1. Results of Genome-wide Linkage Analysis Using 262K NspI SNP Array (Affymetrix) Platform, Showing Three Regions with LOD Score >2.5**

| <b>Chr.</b> | <b>Cytoband</b> | <b>Max LOD score</b> | <b>SNP Max LOD score</b> | <b>Interval size (Mbp)</b> | <b>Gene content</b>              |
|-------------|-----------------|----------------------|--------------------------|----------------------------|----------------------------------|
| 2           | q22.2           | 2.6                  | SNP_A-4208377            | 0.04                       | <i>KYNU</i> ,<br><i>ARHGAP15</i> |
| 6           | p22.1           | 2.8                  | SNP_A-1894559            | 0.15                       | <i>HLA-G</i>                     |
| 16          | q12.2-q21       | 2.93                 | SNP_A-1804307            | 3.4                        | > 80 genes                       |

**Table S2. Ranking of Candidate Homozygous Mismatches According to Location and Evolutionary Conservation**

| <b>Base change</b> | <b>Genomic position</b> | <b>Gene</b>            | <b>Location</b>             | <b>Mammal conserv.</b> |
|--------------------|-------------------------|------------------------|-----------------------------|------------------------|
| <b>A&gt;C</b>      | <b>56608737</b>         | <b><i>C16orf57</i></b> | <b>acceptor splice site</b> | <b>very high</b>       |
| C>T                | 55415773                | <i>NUP93</i>           | intron                      | high                   |
| A>G                | 55742632                | <i>CPNE2-NIP30</i>     | near gene (2kb)             | high                   |
| C>T                | 55848191                | <i>PLLP</i>            | 3' UTR                      | low                    |
| G>C                | 54698403                | <i>BC035113</i>        | intron                      | moderate               |
| A>G                | 55107654                | <i>BBS2</i>            | intron                      | moderate               |
| G>A                | 55738779                | <i>CPNE2</i>           | intron                      | moderate               |
| G>A                | 56222743                | <i>GPR56</i>           | intron                      | moderate               |
| C>G                | 57061773                | <i>NDRG4</i>           | intron                      | moderate               |
| T>C                | 54459899                | <i>CES7</i>            | intron                      | low                    |
| C>T                | 54876398                | <i>GNAO1</i>           | intron                      | low                    |
| C>T                | 54941945                | <i>GNAO1</i>           | intron                      | low                    |
| A>G                | 55586259                | <i>NLRC5</i>           | intron                      | low                    |
| G>A                | 55766270                | <i>NIP30</i>           | intron                      | low                    |
| G>A                | 55795497                | <i>RSPRY1</i>          | intron                      | low                    |
| C>T                | 56045488                | <i>CoQ9</i>            | intron                      | low                    |
| T>C                | 57085085                | <i>NDRG4</i>           | intron                      | low                    |

**Table S3. Primer Pairs and PCR Conditions for *C16orf57* Genomic Analysis**

| <b><i>C16orf57</i></b> | <b>Primers</b> | <b>Sequence</b>      | <b>A.T.<br/>(°C)</b> | <b>Product<br/>size<br/>(bp)</b> |
|------------------------|----------------|----------------------|----------------------|----------------------------------|
| Exon 1                 | Forward        | AGTCGGTGGGCTGAATCT   | 60                   | 325                              |
|                        | Reverse        | TGGCTCTAGGGTGAATGC   |                      |                                  |
| Exon 2                 | Forward        | ACACACACTCAGAGCCACCA | 60                   | 405                              |
|                        | Reverse        | AATGACTTTCCCACCACCAG |                      |                                  |
| Exon 3                 | Forward        | CCTTCTGGGCTTCTTCAT   | 56                   | 455                              |
|                        | Reverse        | CATCAGGGGTGTCAAGAG   |                      |                                  |
| Exon 4                 | Forward        | ACCTGGATGATGTTGTGTGT | 56.8                 | 461                              |
|                        | Reverse        | CTACTGTGCCTGGGATCT   |                      |                                  |
| Exon 5                 | Forward        | GGAGCAGGAAAGCGAGTGTA | 60                   | 286                              |
|                        | Reverse        | ATGGGTCAATGGAGAAGCAG |                      |                                  |
| Exon 6                 | Forward        | TTGTCTGTCTGTGGAGGGTG | 60                   | 352                              |
|                        | Reverse        | CAGGGATTCAGGTTTGGGTG |                      |                                  |
| Exon 7                 | Forward        | AGCATCTGTGTCCTCATCTG | 59                   | 374                              |
|                        | Reverse        | GTTCTCCATCTCAGCCTG   |                      |                                  |

A. T. = Annealing temperature

**Table S4. Primer Pairs and PCR Conditions for *C16orf57* Transcripts Analysis of the (V-2) Homozygous and (P) Compound Heterozygous PN Patients**

| Primer position             | Primers | Sequence               | A. T. (°C) | Product size (bp) |      | See results (Fig.) |
|-----------------------------|---------|------------------------|------------|-------------------|------|--------------------|
|                             |         |                        |            | exp.              | obs. |                    |
| exon 4                      | Forward | ACACCAATCAAGAGAAAACC   | 56         | 374               | 268  | 2C                 |
| 3'UTR                       | Reverse | GTTCCCTCCATCTCAGCCTG   |            |                   |      |                    |
| exon 3/<br>exon 4           | Forward | CCTCCTTCCACAGATTCTTC   | 55         | 419               | 335  | 2F                 |
| 3'UTR                       | Reverse | GTTCCCTCCATCTCAGCCTG   |            |                   |      |                    |
| exon 3<br>exon 5/<br>exon 6 | Forward | TCTGAAAGCCCGTATGACC    | 58         | 199               | 145  | 2H                 |
|                             | Reverse | AGAAGGATCCTGGTAGAAAGTG |            |                   |      |                    |

A. T. = Annealing temperature
